# Supplementary material for: Naturally Occurring Fusarium Species and Mycotoxins in Oat Grains from Manitoba, Canada
Source: MDPI journal article supplement (doi:10.3390/toxins13090670), 2021-09-18
Supplement: s1 [file s1]

# Supplementary Materials: Naturally Occurring *Fusarium* Species and Mycotoxins in Oat Grains from Manitoba, Canada

M. Nazrul Islam, Mourita Tabassum, Mitali Banik, Fouad Daayf, W. G. Dilantha Fernando, Linda J. Harris, Srinivas Sure and Xiben Wang

**Table S1.** *Fusarium* species/chemotype-specific primers sequences.

| Target <i>Fusarium</i> spp.                 | Name of primer | Sequences (5'-3')           | References               |
|---------------------------------------------|----------------|-----------------------------|--------------------------|
| <b>A. Conventional PCR (identification)</b> |                |                             |                          |
| <i>F. poae</i>                              | Fp82F          | CAAGCAAACAGGCTCTTCACC       | Demeke et al. (2005)     |
|                                             | Fp82R          | TGTTCCACCTCAGTGACAGGTT      |                          |
| <i>F. graminearum</i>                       | Fg16F          | CTCCGGATATGTTGCGTCAA        |                          |
|                                             | Fg16R          | GGTAGGTATCCGACATGGCAA       |                          |
| <i>F. sporotrichioides</i>                  | FspF           | CGCACGTATAGATGGACAAG        |                          |
|                                             | FspR           | GTCAGAAGAGACGCATCCGCC       |                          |
| <i>F. avenaceum</i>                         | FaF            | CAAGCATTGTCGCCACTCTC        |                          |
|                                             | FaR            | GTTTGGCTCTACCGGGACTG        |                          |
| <i>F. culmorum</i>                          | FcoF1          | ATGGTGAACTCGTCGTGGC         |                          |
|                                             | FcoR1          | CCCTTCTTACGCCAATCTCG        |                          |
| <b>B. RT-qPCR</b>                           |                |                             |                          |
| <i>F. poae</i>                              | FpA51F         | ACCGAATCTCAACTCCGCTTT       | Nicolaisen et al. (2009) |
|                                             | FpA98R         | GTCTGTCAAGCATGTTAGCACAAGT   |                          |
| <i>F. graminearum</i>                       | FgB397F        | CCATTCCCTGGGCGCT            |                          |
|                                             | FgB411R        | CCTATTGACAGGTGGTTAGTGACTGG  |                          |
| <i>F. sporotrichioides</i>                  | FspA18F        | GCAAGTCGACCACTGTGAGTACA     |                          |
|                                             | FspA85R        | CTGTCAAAGCATGTCAGTAAAAATGAT |                          |
| <b>C. Chemotype detection</b>               |                |                             |                          |
| Multiplex PCR                               |                |                             |                          |
| <i>F. graminearum</i>                       | 3CON           | TGGCAAAGACTGGTTCAC          | Ward et al. (2008)       |
|                                             | 3NA            | GTGCACAGAATATACGAGC         |                          |
|                                             | 3D15A          | ACTGACCCAAGCTGCCATC         |                          |
|                                             | 3D3A           | CGCATTGGCTAACACATG          |                          |
| Singleplex PCR                              |                |                             |                          |
| <i>F. poae</i>                              | nivPF          | TATCCTTGTCATGGCAATGCC       | Dinolfo et al. (2012)    |
|                                             | nivPR          | AAATGGCGATACGAGTATTGA       |                          |
| <b>D. Phylogenetic analysis</b>             |                |                             |                          |

|                |                 |                        |                     |
|----------------|-----------------|------------------------|---------------------|
| <i>F. poae</i> | TEF1 $\alpha$ F | ATGGGTAAGGAGGAGAAGACT  | Witte et al. (2021) |
|                | TEF1 $\alpha$ R | GGAAGTACCAGTGATCATGTT  |                     |
|                | Tri1F           | CGGGCCTGTGGACATCT      |                     |
|                | Tri1R           | GGGTTTCTTGAGCCAATGGAAT |                     |
|                | Tri8F           | ACAACATCCTCTATCGCACAAC |                     |
|                | Tri8R           | GTGATATCCCATGATGCCTTCC |                     |

**Table S2** Precursor and product ions (m/z), retention times, and recoveries of various mycotoxins.

| Mycotoxin (Abbreviation) | Precursor ion<br>(m/z) | Retention Time<br>(min) | Recoveries<br>Mean $\pm$ SD <sup>a</sup> |
|--------------------------|------------------------|-------------------------|------------------------------------------|
| Deoxynivalenol (DON)     | 297.1333               | 4.39                    | 91 $\pm$ 7                               |
| Diacetoxyscirpenol (DAS) | 384.2017               | 8.67                    | 95 $\pm$ 6                               |
| Nivalenol (NIV)          | 313.1282               | 3.36                    | 81 $\pm$ 6                               |
| Beauvericin (BEA)        |                        |                         | 47 $\pm$ 9                               |
| HT-2 Toxin (HT-2)        | 442.2435               | 9.76                    | 94 $\pm$ 5                               |
| T-2 Toxin (T-2)          | 484.2541               | 10.54                   | 119 $\pm$ 6                              |
| Moniliformin (MON)       |                        |                         |                                          |
| Enniatin A (ENN A)       | 699.4903               | 14.28                   | 61 $\pm$ 6                               |
| Enniatin A1 (ENN A1)     | 685.4746               | 14.11                   | 63 $\pm$ 7                               |
| Enniatin B (ENN B)       | 657.4433               | 13.68                   | 55 $\pm$ 4                               |
| Enniatin B1 (ENN B1)     | 671.4903               | 13.91                   | 57 $\pm$ 3                               |

<sup>a</sup> Number of spiked samples,  $n = 9$

**Table S3** List of *F. poae* strains and corresponding crop districts/location of isolates and rotational crop varieties in Manitoba (2016–2018). Group designation was based on *Tef-1α*-*Tri1* - *Tri8* phylogenetic analysis.

| Isolate code | Group | Crop district | Previous crop |
|--------------|-------|---------------|---------------|
| FP2016-27    | I     | CMB           | Canola        |
| FP2017-28    |       | CMB           | Canola        |
| FP2016-24    |       | CMB           | Canola        |
| FP2016-07    |       | CMB           | Canola        |
| FP2016-28    |       | CMB           | Flax          |
| FP2016-06    |       | CMB           | Canola        |
| FP2016-05    |       | CMB           | Canola        |
| FP2016-03    |       | CMB           | Canola        |
| FP2016-02    |       | CMB           | Canola        |
| FP2016-01    |       | CMB           | Canola        |
| FP2016-69    |       | EMB           | Flax          |
| FP2016-29    |       | CMB           | Flax          |
| FP2018-15    |       | SWMB          | Canola        |
| FP2017-12    |       | SWMB          | Canola        |
| FP2018-07    |       | CMB           | Cereal        |
| FP2016-70    |       | CMB           | Cereal        |
| FP2017-32    |       | CMB           | Canola        |
| FP2017-89    |       | CMB           | Canola        |
| FP2018-89    |       | CMB           | Canola        |
| FP2018-32    |       | CMB           | Canola        |
| FP2017-70    |       | CMB           | Flax          |
| FP2018-31    |       | SWMB          | Cereal        |
| FP2018-39    |       | SWMB          | Canola        |
| FP2018-74    |       | SWMB          | Canola        |
| FP2018-108   | II    | INMB          | Canola        |
| FP2018-106   |       | INMB          | Canola        |
| FP2018-105   |       | INMB          | Canola        |
| FP2017-30    |       | INMB          | Canola        |
| FP2018-101   |       | INMB          | Cereal        |

|            |      |        |
|------------|------|--------|
| FP2016-30  | INMB | Flax   |
| FP2018-95  | INMB | Cereal |
| FP2017-97  | INMB | Cereal |
| FP2017-96  | INMB | Canola |
| FP2018-40  | NWMB | Canola |
| FP2018-88  | NWMB | Canola |
| FP2018-84  | NWMB | Canola |
| FP2016-61  | NWMB | Cereal |
| FP2016-43  | NWMB | Canola |
| FP2016-42  | NWMB | Canola |
| FP2016-40  | NWMB | Canola |
| FP2016-59  | NWMB | Canola |
| FP2016-62  | NWMB | Cereal |
| FP2016-71  | EMB  | Cereal |
| FP2018-104 | INMB | Canola |
| FP2018-25  | NWMB | Canola |
| FP2018-02  | NWMB | Flax   |
| FP2018-82  | NWMB | Canola |
| FP2018-83  | NWMB | Canola |
| FP2018-81  | NWMB | Canola |
| FP2018-44  | NWMB | Canola |
| FP2018-38  | III  | NWMB   |
| FP2017-28  |      | NWMB   |
| FP2018-85  |      | NWMB   |
| FP2018-34  |      | NWMB   |
| FP2016-79  |      | EMB    |
| FP2017-77  | IV   | EMB    |
| FP2017-74  |      | CMB    |
| FP2017-51  |      | SWMB   |
| FP2016-13  |      | SWMB   |
| FP2017-68  |      | SWMB   |
| FP2018-13  |      | CMB    |
| FP2017-88  |      | CMB    |
| FP2018-17  |      | CMB    |
| FP2018-16  |      | CMB    |
| FP2018-08  |      | CMB    |

---

|            |      |        |
|------------|------|--------|
| FP2016-13  | CMB  | Flax   |
| FP2016-08  | CMB  | Canola |
| FP2018-12  | CMB  | Canola |
| FP2017-46  | SWMB | Canola |
| FP2017-50  | SWMB | Canola |
| FP2017-54  | SWMB | Canola |
| FP2017-56  | SWMB | Canola |
| FP2017-63  | SWMB | Canola |
| FP2017-66  | SWMB | Canola |
| FP2017-71  | SWMB | Flax   |
| FP2017-18  | SWMB | Canola |
| FP2017-17  | SWMB | Canola |
| FP2018-94  | INMB | Canola |
| FP2018-107 | INMB | Canola |
| FP2016-88  | CMB  | Canola |
| FP2016-90  | CMB  | Canola |
| FP2018-112 | INMB | Canola |
| FP2016-92  | CMB  | Canola |

---

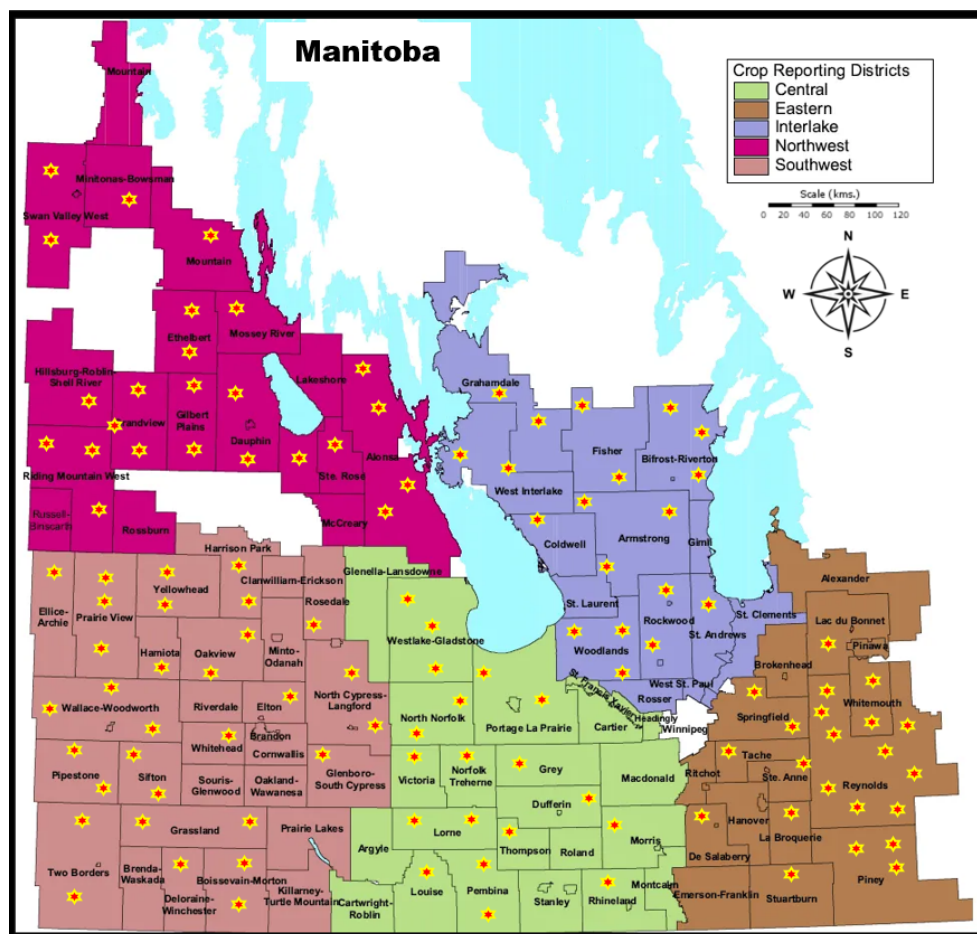

**Figure S1.** Geographical locations of surveyed oat fields in Manitoba from 2016 to 2018.
